# Supplementary material for: Genetic Characterization and Agronomic Evaluation of Drought Tolerance in Ten Egyptian Wheat (Triticum aestivum L.) Cultivars
Source: MDPI journal article supplement (doi:10.3390/agronomy12051217), 2022-05-18
Supplement: s1 [file s1]

**Table S1:** Similarity Index Using SCoT analysis for Ten Wheat Cultivars

|                         | <b>Miser<br/>1</b> | <b>Miser<br/>2</b> | <b>Giza<br/>168</b> | <b>Giza<br/>171</b> | <b>Shandawell<br/>1</b> | <b>Sids<br/>14</b> | <b>Gemmiza<br/>9</b> | <b>Gemmiza<br/>10</b> | <b>Gemmiza<br/>11</b> |
|-------------------------|--------------------|--------------------|---------------------|---------------------|-------------------------|--------------------|----------------------|-----------------------|-----------------------|
| <b>Miser<br/>1</b>      | 1.000              |                    |                     |                     |                         |                    |                      |                       |                       |
| <b>Miser<br/>2</b>      | 0.933              | 1.000              |                     |                     |                         |                    |                      |                       |                       |
| <b>Giza<br/>168</b>     | 0.984              | 0.949              | 1.000               |                     |                         |                    |                      |                       |                       |
| <b>Giza<br/>171</b>     | 0.949              | 0.947              | 0.966               | 1.000               |                         |                    |                      |                       |                       |
| <b>Shandawell<br/>1</b> | 0.951              | 0.949              | 0.933               | 0.931               | 1.000                   |                    |                      |                       |                       |
| <b>Sids<br/>14</b>      | 0.967              | 0.931              | 0.949               | 0.982               | 0.949                   | 1.000              |                      |                       |                       |
| <b>Gemmiza<br/>9</b>    | 0.967              | 0.897              | 0.949               | 0.912               | 0.915                   | 0.931              | 1.000                |                       |                       |
| <b>Gemmiza<br/>10</b>   | 0.984              | 0.949              | 0.967               | 0.931               | 0.967                   | 0.949              | 0.949                | 1.000                 |                       |
| <b>Gemmiza<br/>11</b>   | 0.967              | 0.897              | 0.949               | 0.912               | 0.915                   | 0.931              | 1.000                | 0.949                 | 1.000                 |
| <b>Gemmiza<br/>12</b>   | 0.967              | 0.931              | 0.949               | 0.912               | 0.949                   | 0.931              | 0.931                | 0.983                 | 0.931                 |

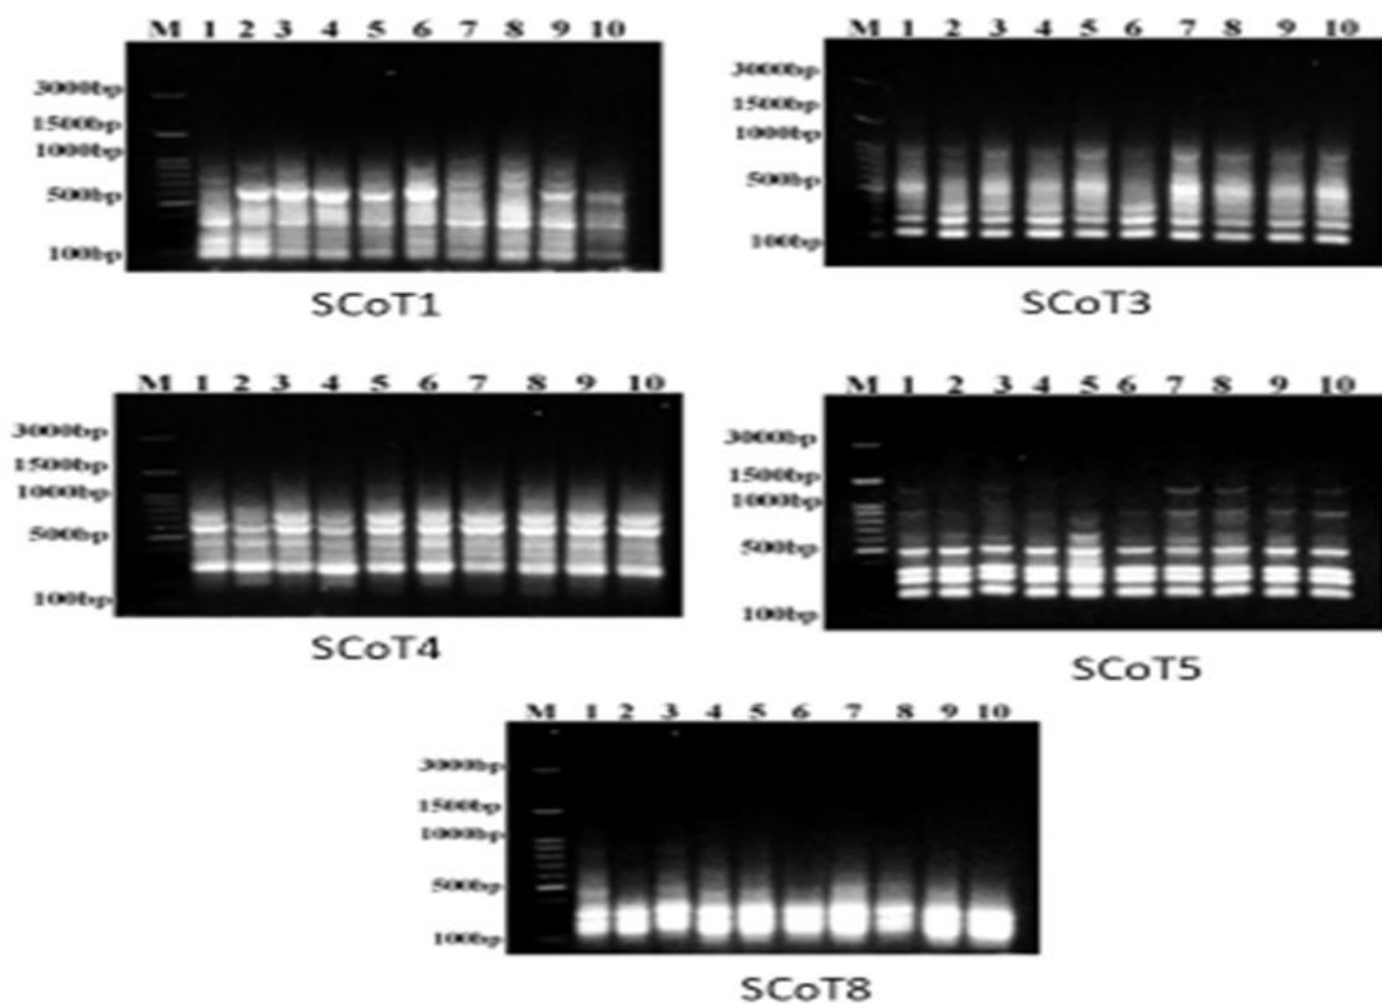

**Figure S1:** SCoT profiles of the ten wheat cultivar generated by five SCoT primers. Lanes 1 to 11; M: molecular weight of DNA marker, 1: Misr1, 2: Misr2, 3: Giza168, 4: Giza171, 5: Shandawell1, 6: Sids14, 7: Gemmiza9, 8: Gemmiza10, 9: Gemmiza11 and 10: Gemmiza12.
